# Supplementary material
Source: bioRxiv or medRxiv preprint supplement (https://medrxiv.org/highwire/filestream/80649/field_highwire_adjunct_files/5/2020.05.08.20095943-5.pdf)
Supplement: Supplementary file [file 2020.05.08.20095943-5.pdf]

Table 3 Descriptive analysis of the RT-PCR Testing capabilities in Ecuador

| <b>Laboratory</b>    | <b>Suspicious</b> | <b>Negative</b> | <b>Positive</b> | <b>Total</b> | <b>PTR%</b> |
|----------------------|-------------------|-----------------|-----------------|--------------|-------------|
| INSPI Cuenca         | 0                 | 1,548           | 548             | 2,096        | 26%         |
| INSPI Guaranda       | 0                 | 14              | 17              | 31           | 55%         |
| INSPI Guayaquil      | 0                 | 2,858           | 5,073           | 7,931        | 64%         |
| INSPI Loja           | 0                 | 59              | 53              | 112          | 47%         |
| INSPI Portoviejo     | 0                 | 0               | 1               | 1            | 100%        |
| INSPI Quevedo        | 0                 | 0               | 2               | 2            | 100%        |
| INSPI Quito          | 9                 | 2,149           | 1,028           | 3,186        | 32%         |
| INSPI Santa Elena    | 0                 | 0               | 2               | 2            | 100%        |
| INSPI Babahoyo       | 0                 | 0               | 1               | 1            | 100%        |
| Public Hospitals     | 8                 | 440             | 261             | 709          | 37%         |
| Private Laboratories | 86                | 2,695           | 2,441           | 5,222        | 47%         |
| ABG/UDLA Lab         | 0                 | 541             | 41              | 582          | 7%          |
| <b>Total</b>         | 103               | 10,304          | 9,468           | 19,875       | 48%         |
